# Supplementary material
Source: PubMed Central journal article supplement (PMC2980843)
Supplement: NIHMS247301-supplement-Supp.pdf [file NIHMS247301-supplement-Supp.pdf]

## **MATERIALS AND METHODS**

### **FSGS cohort and analysis**

All focal segmental glomerulosclerosis (FSGS) cases were biopsy proven. Among these cases, 53 were recruited through the Brigham and Women's Hospital (BWH) from medical centers in the northeastern United States, and 152 were recruited in the US National Institutes of Health (NIH) FSGS Genetic Study from 22 academic medical centers in the United States (S1, S2). As controls, we used DNA from 180 individuals from the NIH Blood Bank and the National Cancer Institute-Frederick normal donor programs.

We selected variants for our initial FSGS genotype study from the 1000 Genomes Project (<http://www.1000genomes.org/>) data using the Integrative Genomics Viewer (<http://www.broadinstitute.org/igv>). We selected variants in the region 34,930kb-35,060kb (NCBI 36) with large frequency differences between Africans and Europeans, together with some additional single nucleotide polymorphisms (SNPs) with biological relevance, and genotyped these SNPs using Sequenom technology (<http://www.sequenom.com/>). We performed association analysis with plink (<http://pngu.mgh.harvard.edu/~purcell/plink/>)(S3) using Fisher's exact test and logistic regression.

This study was approved by the relevant Institutional Review Boards. Investigators obtained written informed consent from all participants in the study.

### **Hypertension-attributed ESKD cohort and analysis**

Selection criteria for controls and hypertension-attributed end-stage kidney disease (H-ESKD) cases are described in detail in Freedman et al (S4). Briefly, self-reported African Americans from North Carolina, South Carolina, Georgia, Virginia, or Tennessee were recruited. Hypertension-attributed ESKD cases were diagnosed with hypertension prior to initiation of renal replacement therapy, and demonstrated hypertensive target end-organ damage (retinopathy or left ventricular hypertrophy) and low grade or absence of proteinuria. Only a minority of cases had quantified urinary protein excretion. Patients with diabetic (type 1 and 2) ESKD were excluded, as were known cases of cystic kidney disease, hereditary nephritis, and urologic causes of ESKD.

Geographically similar controls all denied a history of kidney disease and diabetes, or first-

degree relatives with these diseases. Most controls did not have direct measurements of arterial blood pressure or renal function indices. Consequently, some controls may have had occult kidney disease, which would underestimate the effect size between cases and controls.

The ESKD study was approved by the Wake Forest University School of Medicine Institutional Review Board and conformed with research guidelines in the Declaration of Helsinki Principles. Investigators obtained written informed consent from all participants in the study.

In this cohort, we selected SNPs for association testing based on strong integrated haplotype scores (iHS) scores (<http://hgdp.uchicago.edu>)(S5), composite of multiple signals analysis(S6), and nearby common coding mutations likely to alter protein function.

### **Expression of ApoL1 proteins and trypanolytic assays**

We used two independent systems for expression of recombinant ApoL1: *Escherichia coli* and in 293T cells. The various ApoL1 mutants were generated by site-directed mutagenesis and expressed in *E. coli* as described in Lecordier et al. (S7), except that we used the pStaby1.2 plasmid (Delphi Genetics). For production of ApoL1 protein in 293T cells with and without the G1 and G2 risk mutations, an I.M.A.G.E. clone containing the ApoL1 cDNA lacking the G1 and G2 mutations was purchased from Open Biosystems (reference sequence BC141823). This cDNA is cloned into the pCMV-SPORT6 expression vector. The G1 and G2 mutations were introduced by synthesis of cDNA minigene fragments (Integrated DNA Technologies) containing the corresponding mutations flanked with 5' *AleI* and 3' *XbaI* restriction sequences. The minigene fragments were then cloned into the parental vector replacing the sequence between the *AleI* and *XbaI* restrictions sites. The resulting constructs were transfected into 293T cells using Fugene (Promega). The transfection media was replaced with OPTI-MEM reduced serum media without phenol red (Invitrogen) at 12 hours post transfection. At 72 hours post transfection, the supernatants were harvested and concentrated 100-fold using an Amicon Ultracel-10K centrifugal filter unit (Millipore). The media was exchanged by centrifugation within the Ultracel filters with fresh Iscove's Modified Dulbecco's Medium for compatibility with the trypanosome killing assay. The evaluation of trypanolytic activity of the various ApoL1 mutants was performed as described in Lecordier et al (S7). The trypanosome clones used in these experiments were ETat 1.2: Edinburgh

Trypanozoon antigenic type 1, clone 2.

## Natural selection analyses

To perform the haplotype computations for natural selection we used all 167 Yoruba samples (YRI) and the 165 European samples (CEU) genotyped from Hapmap (<http://hapmap.ncbi.nlm.nih.gov/>) genotyped on a panel of 1,440,616 SNPs. Data was phased using Beagle (S8) and analyzed using Matlab (<http://www.mathworks.com/>).

To test for statistically significant differentiation of allele frequency between CEU and YRI, we modeled random genetic drift as described in Ayodo et al (S9). We assumed that the difference in frequencies for a given polymorphism has mean 0 and variance  $cp(1-p)$ , where  $p$  is the ancestral frequency and  $c=2xF_{ST}$ . We modeled sampling noise as having variance  $p(1-p)(1/N_1+N_2)$ , where  $N_1$  and  $N_2$  are the total count for the alleles for the two populations. Therefore, to test for differentiation of frequency at a given allele, we model the difference as a normal random variable with mean 0 and variance  $p(1-p)(c+1/N_1+1/N_2)$  and we compute for each allele a  $\chi^2$  statistic with 1 degree of freedom.

We computed  $iHS$  and  $\Delta iHH$  as in Voight et al.(S5) and Grossman et al (S6). We determined the derived allele using data from the Haplotter website (<http://haplotter.uchicago.edu/selection/>). For every SNP with minor allele frequency above 5% we computed extended haplotype homozygosity (EHH) values for haplotypes carrying the ancestral and the derived allele. As performed in Sabeti et al.(S10), we integrated the quantity  $(EHH-0.05+1/N)$ , with  $N$  equal to the number of haplotypes containing the ancestral allele, over the genetic distance measured in centimorgans (cM) provided from the Hapmap website (<http://hapmap.ncbi.nlm.nih.gov/downloads/recombination/>) to obtain  $iHH_A$ . The value for  $iHH_D$  was computed in the same way using the EHH for the derived allele. We then computed  $\Delta iHH=iHH_D-iHH_A$  and the unstandardized integrated haplotype score  $iHS=\ln(iHH_A/iHH_D)$  and we computed this value for every SNP in the Yoruba dataset. For SNPs with the same number of haplotypes containing the derived allele we normalized the score by removing the mean and dividing by the standard deviation of that particular group. The normalized scores define the  $iHS$ . Results for the whole region from 34,900kb-35,100kb

(NCBI 36) are reported in Table S4. We omitted the Cross Population Extended Haplotype Homozygosity test (XP-EHH) as this test is devised to detect selective sweeps in which the selected allele has approached or achieved fixation in one population but remains polymorphic in the human population as a whole(S10).

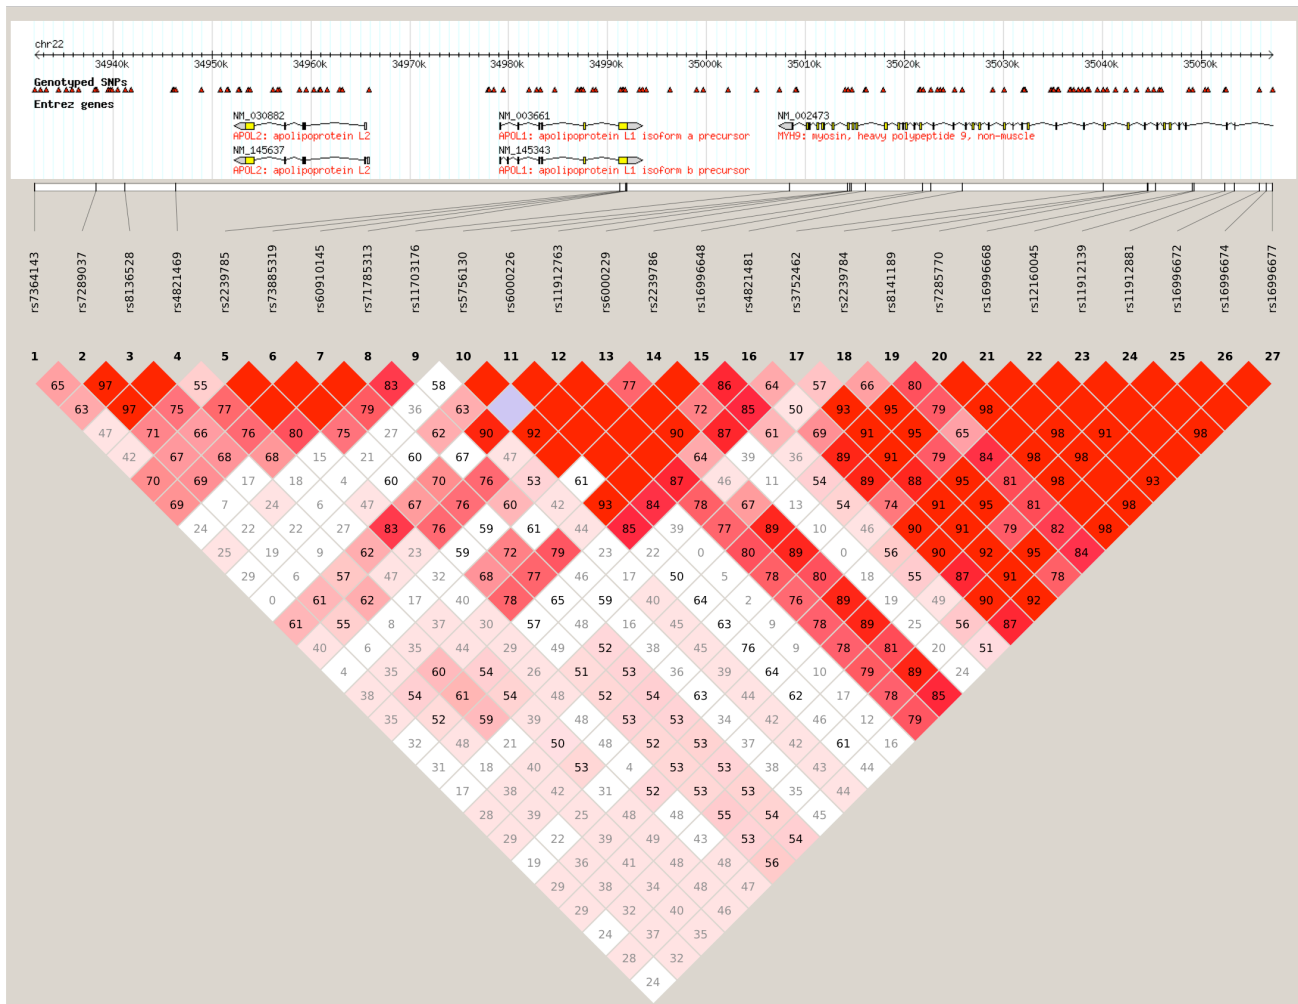

**Figure S1.** Linkage disequilibrium patterns ( $D'$ ) in African American controls from NIH ( $n=180$ ) for the three disease associated variants and all of the variants we tested that are also present in HapMap (Figure created using Haploview) (S11).

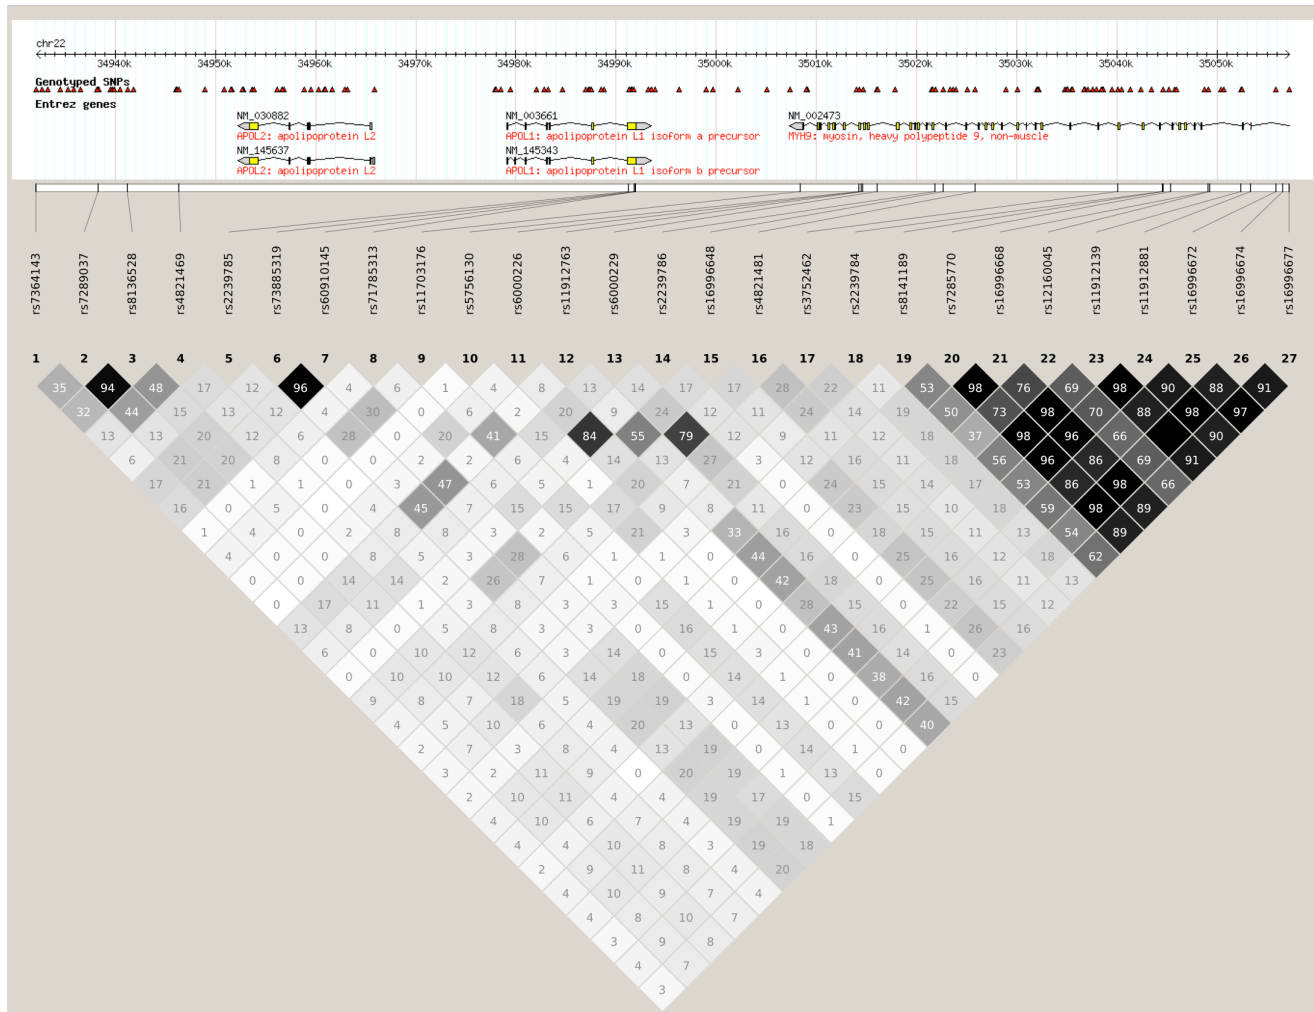

**Figure S2.** Linkage disequilibrium patterns ( $r^2$ ) in African American controls from NIH (n=180) for the three disease associated variants and all of the variants we tested that are also present in HapMap (Figure created using Haploview) (S11).

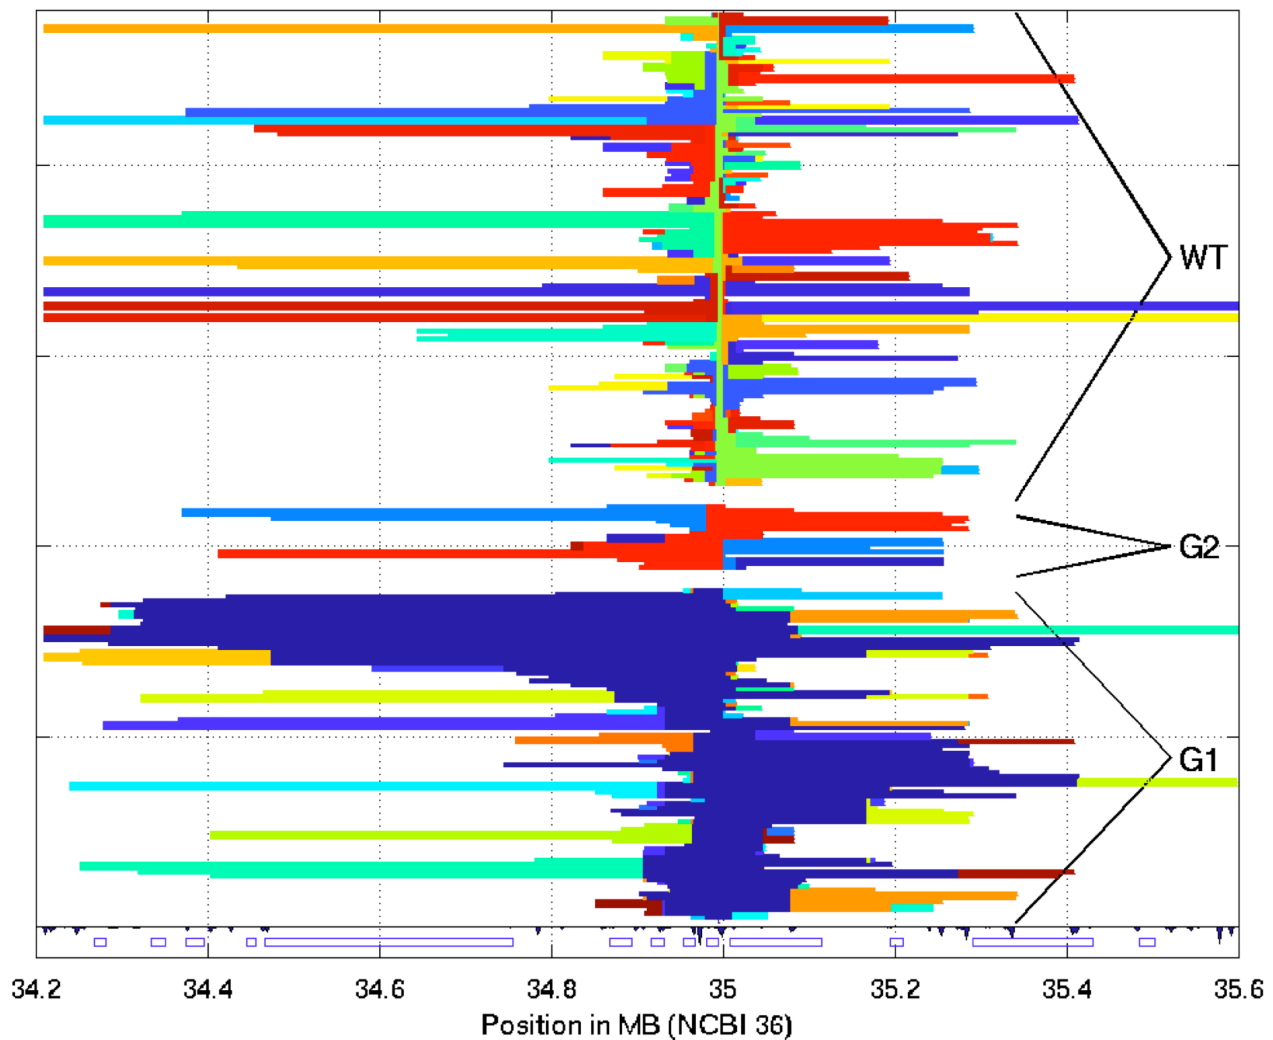

**Figure S3.** Haplotype structure in the Yoruba samples from Hapmap. The 230 chromosomes from the 167 Yoruba samples, a mix of trios, pairs, and unrelated samples, were divided in three groups according to the presence of the core alleles G1 (n=88), G2 (n=17), or the absence of either (n=125). Haplotypes were colored in such a way that chromosomes with the same color at a given position have the same haplotype from that position up to the position of the C-terminal part of APOL1, and their colors are different when this is not the case. Recombination hotspots ascertained from Hapmap are displayed below together with genes RASD2, MB, APOL6, APOL5, RBM9, APOL3, APOL4, APOL2, APOL1, MYH9, TXN2, CACNG2, and RABL4 (blue rectangles, from left to right). As suggested from the picture, patterns of linkage disequilibrium for G1 extend far from the linkage disequilibrium block containing APOL1, which leads to strong association with kidney disease for variants in MYH9, the closest gene to APOL1 by genetic distance.

**Table S1.** Association of variants on chromosome 22 with focal segmental glomerulosclerosis (FSGS) using Fisher's exact test and logistic regression conditioning first on rs73885319 and then on both rs73885319 and rs71785313.

| Variant           | Position (NCBI 36) | Derived allele | Ancestral allele | Frequency derived allele in affected (n=205) | Frequency derived allele in unaffected (n=180) | P-value for Fisher's exact test | P-value after conditioning on rs73885319 | P-value after conditioning on rs73885319 and rs71785313 |
|-------------------|--------------------|----------------|------------------|----------------------------------------------|------------------------------------------------|---------------------------------|------------------------------------------|---------------------------------------------------------|
| rs11089781        | 34886714           | A              | G                | 0.32                                         | 0.21                                           | 0.0013                          | 0.925                                    | 0.2439                                                  |
| rs7364143         | 34932129           | T              | G                | 0.56                                         | 0.4                                            | 9.904e-06                       | 0.9919                                   | 0.1461                                                  |
| rs7289037         | 34938336           | A              | G                | 0.53                                         | 0.33                                           | 5.118e-08                       | 0.2779                                   | 0.8734                                                  |
| rs8136528         | 34941252           | T              | C                | 0.52                                         | 0.34                                           | 4.977e-07                       | 0.5498                                   | 0.3631                                                  |
| rs4821469         | 34946391           | C              | T                | 0.3                                          | 0.49                                           | 9.835e-08                       | 0.0545                                   | 0.3533                                                  |
| rs73885303        | 34953617           | T              | C                | 0                                            | 0                                              | 0.4759                          | 0.9993                                   | 0.9993                                                  |
| rs10854687        | 34954365           | A              | C                | 0.51                                         | 0.3                                            | 4.117e-09                       | 0.3387                                   | 0.4109                                                  |
| rs9622362         | 34986390           | A              | C                | 0.04                                         | 0.09                                           | 0.0149                          | 0.8758                                   | 0.13                                                    |
| rs9622363         | 34986501           | A              | G                | 0.82                                         | 0.51                                           | 6.112e-20                       | 0.0002                                   | 0.8217                                                  |
| rs41297245        | 34987686           | A              | G                | 0.01                                         | 0.05                                           | 0.0009                          | 0.1298                                   | 0.5326                                                  |
| rs2239785         | 34991276           | A              | G                | 0.14                                         | 0.35                                           | 3.081e-12                       | 0.0057                                   | 0.9337                                                  |
| rs136175          | 34991512           | A              | G                | 0.03                                         | 0.07                                           | 0.0171                          | 0.2976                                   | 0.8123                                                  |
| rs73403889        | 34991637           | A              | G                | 0                                            | 0                                              | 1                               | 0.9993                                   | 0.9993                                                  |
| rs16996616        | 34991837           | A              | G                | 0.03                                         | 0.08                                           | 0.0093                          | 0.5397                                   | 0.3839                                                  |
| <b>rs73885319</b> | <b>34991852</b>    | <b>G</b>       | <b>A</b>         | <b>0.53</b>                                  | <b>0.19</b>                                    | <b>1.070e-23</b>                | <b>NaN</b>                               | <b>NaN</b>                                              |
| <b>rs60910145</b> | <b>34991980</b>    | <b>G</b>       | <b>T</b>         | <b>0.52</b>                                  | <b>0.18</b>                                    | <b>2.591e-23</b>                | <b>0.6051</b>                            | <b>0.7417</b>                                           |
| <b>rs71785313</b> | <b>34991997</b>    | <b>D</b>       | <b>I</b>         | <b>0.23</b>                                  | <b>0.15</b>                                    | <b>0.0089</b>                   | <b>4.377e-07</b>                         | <b>NaN</b>                                              |
| rs58384577        | 34993159           | C              | T                | 0.49                                         | 0.19                                           | 9.782e-18                       | 0.1982                                   | 0.3419                                                  |
| rs60295735        | 34997100           | A              | G                | 0.5                                          | 0.2                                            | 9.128e-17                       | 0.6759                                   | 0.9987                                                  |
| rs56277602        | 34998706           | T              | G                | 0.5                                          | 0.76                                           | 2.359e-13                       | 0.3886                                   | 0.5788                                                  |
| rs73885325        | 35000629           | T              | A                | 0.49                                         | 0.25                                           | 6.903e-12                       | 0.3589                                   | 0.5589                                                  |
| NA                | 35005098           | A              | G                | 0.44                                         | 0.22                                           | 1.482e-09                       | 0.1207                                   | 0.285                                                   |
| rs73405714        | 35005359           | G              | A                | 0.44                                         | 0.22                                           | 9.451e-10                       | 0.1746                                   | 0.3297                                                  |
| rs11703176        | 35008422           | A              | C                | 0.48                                         | 0.31                                           | 3.782e-06                       | 0.0257                                   | 0.1264                                                  |
| rs58168942        | 35012680           | A              | G                | 0.4                                          | 0.19                                           | 2.652e-10                       | 0.2972                                   | 0.4001                                                  |
| rs5756130         | 35014277           | T              | C                | 0.06                                         | 0.1                                            | 0.0814                          | 0.2318                                   | 0.5038                                                  |
| rs6000226         | 35014513           | T              | C                | 0.32                                         | 0.26                                           | 0.0909                          | 0.0001                                   | 0.1419                                                  |
| rs11912763        | 35014668           | A              | G                | 0.41                                         | 0.19                                           | 9.573e-12                       | 0.4741                                   | 0.529                                                   |



|            |          |   |   |      |      |           |        |        |
|------------|----------|---|---|------|------|-----------|--------|--------|
| rs11549907 | 35014926 | T | C | 0.06 | 0.08 | 0.2976    | 0.9798 | 0.4356 |
| rs6000229  | 35016105 | T | C | 0.2  | 0.36 | 5.378e-06 | 0.1074 | 0.9112 |
| rs6000223  | 35017908 | O | A | 0    | 0    | 1         | NaN    | NaN    |
| rs73405726 | 35018652 | C | G | 0.47 | 0.29 | 3.090e-07 | 0.1368 | 0.3053 |
| rs73405727 | 35020433 | T | C | 0.42 | 0.19 | 2.243e-11 | 0.5361 | 0.5282 |
| rs2239786  | 35021873 | C | G | 0.32 | 0.29 | 0.4288    | 0.0005 | 0.1924 |
| rs16996648 | 35022698 | C | T | 0.47 | 0.29 | 3.090e-07 | 0.1368 | 0.3063 |
| rs56339459 | 35023558 | T | C | 0.42 | 0.19 | 8.107e-12 | 0.3864 | 0.4316 |
| rs4821481  | 35025888 | T | C | 0.17 | 0.36 | 4.398e-09 | 0.0037 | 0.2728 |
| rs6000235  | 35026033 | C | T | 0.78 | 0.53 | 7.393e-13 | 0.0027 | 0.4815 |
| rs3752462  | 35040129 | T | C | 0.13 | 0.28 | 1.820e-07 | 0.0031 | 0.1644 |
| rs2239784  | 35044581 | T | C | 0.28 | 0.37 | 0.006     | 0.743  | 0.1031 |
| rs8141189  | 35044656 | T | A | 0.43 | 0.3  | 0.0003    | 0.3762 | 0.5344 |
| rs7285770  | 35045413 | A | G | 0.41 | 0.25 | 5.869e-06 | 0.3736 | 0.5092 |
| rs55816447 | 35047283 | T | C | 0.42 | 0.25 | 7.291e-07 | 0.3485 | 0.4334 |
| rs55670830 | 35049098 | A | G | 0.61 | 0.76 | 2.948e-05 | 0.2393 | 0.3437 |
| rs16996668 | 35049131 | G | C | 0.42 | 0.25 | 2.920e-06 | 0.4054 | 0.5467 |
| rs12160045 | 35049306 | G | A | 0.45 | 0.32 | 0.0004    | 0.1751 | 0.45   |
| rs11912139 | 35052407 | T | C | 0.41 | 0.25 | 1.340e-06 | 0.289  | 0.3368 |
| rs11912881 | 35053384 | A | T | 0.41 | 0.25 | 8.857e-06 | 0.3462 | 0.4146 |
| rs16996672 | 35055916 | T | C | 0.45 | 0.27 | 1.611e-07 | 0.6268 | 0.8562 |
| rs16996674 | 35056598 | T | C | 0.41 | 0.25 | 3.157e-06 | 0.3884 | 0.4494 |
| rs16996677 | 35057229 | A | G | 0.45 | 0.26 | 6.587e-08 | 0.7119 | 0.954  |

**Table S2.** Association of variants on chromosome 22 with hypertension-attributed end-stage kidney disease (H-ESKD) using Fisher's exact test and logistic regression conditioning first on rs73885319 and then on both rs73885319 and rs71785313.

| Variant           | Position (NCBI 36) | Derived allele | Ancestral allele | Frequency derived allele in affected (n=1030) | Frequency derived allele in unaffected (n=1025) | P-value for Fisher's exact test | P-value after conditioning on rs73885319 | P-value after conditioning on rs73885319 and rs71785313 |
|-------------------|--------------------|----------------|------------------|-----------------------------------------------|-------------------------------------------------|---------------------------------|------------------------------------------|---------------------------------------------------------|
| rs5999985         | 34452302           | A              | G                | 0.05                                          | 0.04                                            | 0.3704                          | 0.2828                                   | 0.2178                                                  |
| rs41283201        | 34452326           | A              | T                | 0.07                                          | 0.06                                            | 0.2551                          | 0.3638                                   | 0.617                                                   |
| rs2157258         | 34672336           | C              | T                | 0.31                                          | 0.33                                            | 0.2308                          | 0.0232                                   | 0.036                                                   |
| rs16996299        | 34778586           | T              | C                | 0.41                                          | 0.34                                            | 3.596e-06                       | 0.0567                                   | 0.5757                                                  |
| rs6000152         | 34868999           | A              | G                | 0.08                                          | 0.07                                            | 0.329                           | 0.2081                                   | 0.1121                                                  |
| rs7284379         | 34881360           | T              | C                | 0.28                                          | 0.19                                            | 7.393e-11                       | 0.0045                                   | 0.0939                                                  |
| rs11089781        | 34886714           | A              | G                | 0.29                                          | 0.21                                            | 1.243e-10                       | 0.0065                                   | 0.1118                                                  |
| rs132653          | 34886769           | T              | G                | 0.44                                          | 0.48                                            | 0.0154                          | 0.5453                                   | 0.3879                                                  |
| rs6000173         | 34917169           | T              | G                | 0.26                                          | 0.34                                            | 2.776e-08                       | 0.0008                                   | 0.0651                                                  |
| rs61730819        | 34917292           | T              | C                | 0.08                                          | 0.11                                            | 0.0005                          | 0.1326                                   | 0.5655                                                  |
| rs2016708         | 34948899           | T              | C                | 0.42                                          | 0.25                                            | 1.031e-29                       | 9.595e-06                                | 0.044                                                   |
| rs1001293         | 34960895           | T              | C                | 0.45                                          | 0.31                                            | 2.796e-20                       | 0.0063                                   | 0.3886                                                  |
| rs9622363         | 34986501           | A              | G                | 0.72                                          | 0.53                                            | 5.537e-34                       | 6.124e-08                                | 0.4915                                                  |
| rs136168          | 34990788           | A              | G                | 0.44                                          | 0.54                                            | 2.402e-10                       | 0.0135                                   | 0.5                                                     |
| rs16996616        | 34991837           | A              | G                | 0.05                                          | 0.08                                            | 0.0007                          | 0.5301                                   | 0.3903                                                  |
| <b>rs73885319</b> | <b>34991852</b>    | <b>G</b>       | <b>A</b>         | <b>0.41</b>                                   | <b>0.21</b>                                     | <b>3.435e-40</b>                | <b>NaN</b>                               | <b>NaN</b>                                              |
| <b>rs71785313</b> | <b>34991988</b>    | <b>D</b>       | <b>I</b>         | <b>0.21</b>                                   | <b>0.13</b>                                     | <b>7.056e-10</b>                | <b>8.798e-18</b>                         | <b>NaN</b>                                              |
| rs7078            | 35007860           | G              | A                | 0.1                                           | 0.15                                            | 3.958e-05                       | 0.1648                                   | 0.97                                                    |
| rs12107           | 35007928           | A              | G                | 0.07                                          | 0.11                                            | 1.827e-05                       | 0.0504                                   | 0.4258                                                  |
| rs16996639        | 35008348           | A              | G                | 0.1                                           | 0.08                                            | 0.062                           | 0.0021                                   | 0.4986                                                  |
| rs11089787        | 35008399           | G              | C                | 0.48                                          | 0.38                                            | 1.715e-10                       | 0.156                                    | 0.8759                                                  |
| rs735853          | 35009159           | G              | C                | 0.07                                          | 0.11                                            | 1.167e-06                       | 0.0159                                   | 0.3515                                                  |
| rs58168942        | 35012680           | A              | G                | 0.34                                          | 0.2                                             | 5.203e-24                       | 0.9944                                   | 0.6896                                                  |
| rs5756129         | 35014138           | C              | T                | 0.15                                          | 0.21                                            | 6.215e-07                       | 0.061                                    | 0.8231                                                  |
| rs11912763        | 35014668           | A              | G                | 0.34                                          | 0.19                                            | 5.768e-24                       | 0.3702                                   | 0.5297                                                  |
| rs56020676        | 35020066           | C              | T                | 0.4                                           | 0.26                                            | 1.136e-19                       | 0.5497                                   | 0.459                                                   |
| rs73885341        | 35021424           | A              | G                | 0.4                                           | 0.27                                            | 4.573e-17                       | 0.9711                                   | 0.6416                                                  |
| rs4821480         | 35025193           | T              | G                | 0.26                                          | 0.4                                             | 6.162e-21                       | 6.763e-06                                | 0.0965                                                  |
| rs2032487         | 35025374           | T              | C                | 0.25                                          | 0.38                                            | 3.872e-20                       | 2.137e-05                                | 0.1363                                                  |

|            |          |   |   |      |      |           |           |        |
|------------|----------|---|---|------|------|-----------|-----------|--------|
| rs4821481  | 35025888 | T | C | 0.26 | 0.4  | 7.197e-21 | 8.516e-06 | 0.0962 |
| rs2413396  | 35038030 | C | T | 0.28 | 0.42 | 1.124e-16 | 0.0006    | 0.6024 |
| rs5750250  | 35038429 | G | A | 0.32 | 0.5  | 2.475e-26 | 4.145e-08 | 0.0163 |
| rs3752462  | 35040129 | T | C | 0.19 | 0.27 | 6.410e-09 | 0.0287    | 0.7214 |
| rs11912881 | 35053384 | A | T | 0.34 | 0.25 | 5.712e-11 | 0.8152    | 0.8574 |
| rs16996674 | 35056598 | T | C | 0.34 | 0.23 | 7.141e-13 | 0.47      | 0.4214 |
| rs16996677 | 35057229 | A | G | 0.36 | 0.27 | 1.943e-10 | 0.9985    | 0.9281 |

**Table S3.** Natural selection analysis of the APOL1 region. In the last seven columns are reported fixation index ( $F_{ST}$ ) values for the Yoruba population (YRI) and the European population (CEU) from Hapmap, p-values for frequency differentiation according to the method described in Ayodo et al (S9),  $\Delta DAF$ ,  $iHH_D$ ,  $iHH_A$ ,  $iHS$ , and  $\Delta iHH$  scores for these variants in the Yoruba population computed as described in Voight et al. (S5) and Grossman et al (S6).

| Variant    | Position (NCBI 36) | Derived allele | Ancestral allele | Frequency derived allele in YRI (n=167) | Frequency derived allele in CEU (n=165) | $F_{ST}$ | P      | $\Delta DAF$ | $iHH_D$ | $iHH_A$ | $iHS$   | $\Delta iHH$ |
|------------|--------------------|----------------|------------------|-----------------------------------------|-----------------------------------------|----------|--------|--------------|---------|---------|---------|--------------|
| rs12185880 | 34900774           | G              | C                | 0.14                                    | 0.02                                    | 0.0519   | 0.2959 | 0.12         | 0.1141  | 0.0458  | 0.6682  | 0.0682       |
| rs132681   | 34904713           | A              | G                | 0.07                                    | 0.24                                    | 0.0567   | 0.2738 | -0.17        | 0.2093  | 0.04    | 0.5043  | 0.1693       |
| rs132683   | 34905610           | A              | G                | 0.67                                    | 0.28                                    | 0.1555   | 0.0664 | 0.39         | 0.0742  | 0.0946  | 1.5193  | -0.0204      |
| rs132686   | 34906596           | G              | A                | 0                                       | 0.3                                     | 0.1777   | 0.0495 | -0.3         | NaN     | NaN     | NaN     | NaN          |
| rs132688   | 34906886           | A              | G                | 0                                       | 0.29                                    | 0.1644   | 0.059  | -0.29        | NaN     | NaN     | NaN     | NaN          |
| rs6000164  | 34907077           | T              | C                | 0.12                                    | 0                                       | 0.0631   | 0.2473 | 0.12         | 0.1337  | 0.0523  | 1.0651  | 0.0813       |
| rs132689   | 34907092           | A              | G                | 0.1                                     | 0.29                                    | 0.0578   | 0.2691 | -0.19        | 0.1932  | 0.0467  | 0.4534  | 0.1465       |
| rs5995235  | 34907888           | T              | C                | 0.33                                    | 0.04                                    | 0.1384   | 0.0836 | 0.29         | 0.0392  | 0.0921  | 2.0781  | -0.0529      |
| rs6000167  | 34908800           | G              | A                | 0.45                                    | 0.58                                    | 0.0177   | 0.5593 | -0.12        | 0.0225  | 0.1531  | 2.9392  | -0.1306      |
| rs132692   | 34909112           | C              | T                | 0.97                                    | 0.72                                    | 0.118    | 0.1106 | 0.25         | NaN     | NaN     | NaN     | NaN          |
| rs132693   | 34909507           | A              | G                | 0.01                                    | 0.23                                    | 0.1196   | 0.1082 | -0.22        | NaN     | NaN     | NaN     | NaN          |
| rs2239831  | 34913030           | C              | T                | 0.87                                    | 0.44                                    | 0.2054   | 0.0345 | 0.43         | 0.0647  | 0.1054  | -0.7131 | -0.0407      |
| rs916338   | 34914376           | T              | C                | 0.01                                    | 0.24                                    | 0.1224   | 0.104  | -0.23        | NaN     | NaN     | NaN     | NaN          |
| rs132697   | 34914659           | A              | G                | 0.01                                    | 0.23                                    | 0.1139   | 0.1176 | -0.22        | NaN     | NaN     | NaN     | NaN          |
| rs8136064  | 34914892           | G              | T                | 0.02                                    | 0.04                                    | 0.0082   | 0.7165 | -0.03        | NaN     | NaN     | NaN     | NaN          |
| rs1053982  | 34915510           | T              | C                | 0.25                                    | 0.56                                    | 0.1017   | 0.1391 | -0.31        | 0.0378  | 0.0958  | 2.4848  | -0.0579      |
| rs5756091  | 34915667           | T              | G                | 0.24                                    | 0.56                                    | 0.1078   | 0.1276 | -0.32        | 0.0446  | 0.093   | 2.0092  | -0.0484      |
| rs5756093  | 34915917           | A              | G                | 0                                       | 0                                       | NaN      | NaN    | 0            | NaN     | NaN     | NaN     | NaN          |
| rs6000172  | 34917148           | G              | A                | 0.24                                    | 0.54                                    | 0.0974   | 0.1479 | -0.3         | 0.0466  | 0.0925  | 2.1149  | -0.0459      |
| rs6000174  | 34917225           | A              | G                | 0.24                                    | 0.54                                    | 0.0972   | 0.1486 | -0.3         | 0.0466  | 0.0925  | 2.1149  | -0.0459      |
| rs2227167  | 34917432           | A              | G                | 0.24                                    | 0.54                                    | 0.099    | 0.1446 | -0.3         | 0.0466  | 0.0925  | 2.1149  | -0.0459      |
| rs2269596  | 34920892           | T              | C                | 0.77                                    | 0.47                                    | 0.0986   | 0.1455 | 0.3          | 0.0911  | 0.0541  | -1.8428 | 0.037        |
| rs2007468  | 34921326           | A              | G                | 0.12                                    | 0.52                                    | 0.193    | 0.0406 | -0.41        | 0.1469  | 0.0746  | 1.2289  | 0.0723       |
| rs2007706  | 34922316           | C              | T                | 0.01                                    | 0.53                                    | 0.3359   | 0.0067 | -0.51        | NaN     | NaN     | NaN     | NaN          |
| rs132717   | 34926598           | C              | T                | 0.23                                    | 0.61                                    | 0.1443   | 0.0771 | -0.37        | 0.09    | 0.1119  | 1.5478  | -0.0219      |
| rs132734   | 34927823           | G              | A                | 0.23                                    | 0.6                                     | 0.1483   | 0.073  | -0.38        | 0.0891  | 0.1099  | 1.5004  | -0.0208      |

|            |          |   |   |      |      |        |        |       |        |        |         |         |
|------------|----------|---|---|------|------|--------|--------|-------|--------|--------|---------|---------|
| rs132735   | 34927827 | T | G | 0.48 | 0.27 | 0.0503 | 0.3041 | 0.21  | 0.2457 | 0.0488 | -1.3619 | 0.1969  |
| rs5995251  | 34930704 | T | A | 0.39 | 0.38 | 0.0026 | 0.9279 | 0.02  | 0.0542 | 0.1867 | 2.1688  | -0.1325 |
| rs6000190  | 34930787 | G | A | 0.39 | 0.38 | 0.0026 | 0.9279 | 0.02  | 0.0542 | 0.1867 | 2.1688  | -0.1325 |
| rs5995252  | 34931145 | T | C | 0.4  | 0.37 | 0.0031 | 0.8933 | 0.03  | 0.0525 | 0.1896 | 2.0349  | -0.1371 |
| rs7364143  | 34932129 | T | G | 0.47 | 0.25 | 0.0542 | 0.2851 | 0.22  | 0.3243 | 0.0266 | -1.758  | 0.2976  |
| rs5995255  | 34932725 | T | G | 0.42 | 0.38 | 0.0043 | 0.831  | 0.04  | 0.0499 | 0.1933 | 2.1875  | -0.1434 |
| rs6000197  | 34933240 | A | G | 0.42 | 0.37 | 0.0049 | 0.8077 | 0.05  | 0.0473 | 0.2062 | 2.1831  | -0.159  |
| rs132744   | 34934551 | T | C | 0.48 | 0.07 | 0.2182 | 0.0293 | 0.42  | 0.3452 | 0.0288 | -2.3276 | 0.3164  |
| rs132745   | 34935277 | C | T | 0.15 | 0.24 | 0.0128 | 0.6296 | -0.08 | 0.0793 | 0.0947 | 1.9529  | -0.0154 |
| rs132746   | 34935337 | C | T | 0.15 | 0.24 | 0.0141 | 0.6093 | -0.09 | 0.0855 | 0.0934 | 1.8959  | -0.0079 |
| rs8142325  | 34935923 | T | A | 0.46 | 0    | 0.2967 | 0.0109 | 0.46  | 0.3925 | 0.0192 | -2.367  | 0.3733  |
| rs132749   | 34936575 | T | C | 0.81 | 0.5  | 0.1048 | 0.1331 | 0.31  | 0.0904 | 0.1129 | 1.7405  | -0.0225 |
| rs9610448  | 34938151 | A | G | 0.78 | 0.44 | 0.1246 | 0.1009 | 0.34  | 0.0726 | 0.121  | 1.8981  | -0.0484 |
| rs132750   | 34938295 | C | T | 0.03 | 0.23 | 0.0932 | 0.1573 | -0.2  | NaN    | NaN    | NaN     | NaN     |
| rs7289037  | 34938336 | A | G | 0.49 | 0.11 | 0.1744 | 0.0517 | 0.38  | 0.3518 | 0.0207 | -2.3661 | 0.3311  |
| rs11704479 | 34939580 | A | G | 0    | 0.08 | 0.0416 | 0.3522 | -0.08 | NaN    | NaN    | NaN     | NaN     |
| rs4820222  | 34939685 | C | T | 0.78 | 0.44 | 0.1246 | 0.1009 | 0.34  | 0.0946 | 0.1158 | 1.5535  | -0.0211 |
| rs6000199  | 34939878 | A | G | 0.08 | 0.11 | 0.0044 | 0.8251 | -0.03 | 0.2801 | 0.0774 | 0.8319  | 0.2026  |
| rs8140384  | 34940517 | C | T | 0.79 | 0.44 | 0.1336 | 0.0892 | 0.35  | 0.1038 | 0.1118 | 1.5156  | -0.008  |
| rs8136528  | 34941252 | T | C | 0.48 | 0.11 | 0.171  | 0.054  | 0.38  | 0.3518 | 0.0194 | -2.4246 | 0.3324  |
| rs5995259  | 34941809 | A | G | 0.18 | 0.33 | 0.0329 | 0.4116 | -0.15 | 0.084  | 0.1061 | 1.9637  | -0.0221 |
| rs1315     | 34946081 | C | A | 0.1  | 0.23 | 0.031  | 0.4267 | -0.13 | 0.1912 | 0.0844 | 1.2233  | 0.1068  |
| rs4821467  | 34946146 | A | G | 0.49 | 0.11 | 0.1766 | 0.0502 | 0.38  | 0.3518 | 0.0186 | -2.4632 | 0.3332  |
| rs4821469  | 34946391 | C | T | 0.34 | 0.89 | 0.3225 | 0.008  | -0.55 | 0.1697 | 0.0412 | -2.097  | 0.1286  |
| rs763086   | 34949003 | G | A | 0.66 | 0.34 | 0.1044 | 0.1339 | 0.32  | 0.0447 | 0.173  | 2.394   | -0.1283 |
| rs11703398 | 34950907 | A | G | 0.83 | 0.77 | 0.0086 | 0.7079 | 0.06  | 0.1014 | 0.0723 | -1.5356 | 0.0291  |
| rs2006259  | 34951559 | A | C | 0.65 | 0.34 | 0.0997 | 0.1433 | 0.31  | 0.0432 | 0.1763 | 2.3864  | -0.1331 |
| rs132757   | 34951655 | T | C | 0    | 0.24 | 0.1361 | 0.0862 | -0.24 | NaN    | NaN    | NaN     | NaN     |
| rs9619597  | 34952768 | T | G | 0    | 0.11 | 0.0587 | 0.2652 | -0.11 | NaN    | NaN    | NaN     | NaN     |
| rs129607   | 34952852 | T | C | 0.39 | 0.46 | 0.0063 | 0.7649 | -0.06 | 0.0387 | 0.2083 | 2.7583  | -0.1696 |
| rs132760   | 34953677 | T | C | 0    | 0    | NaN    | NaN    | 0     | NaN    | NaN    | NaN     | NaN     |
| rs7285167  | 34953866 | A | G | 0.46 | 0.11 | 0.1522 | 0.0694 | 0.35  | 0.4127 | 0.0167 | -2.557  | 0.396   |
| rs11089784 | 34956223 | T | C | 0.1  | 0.23 | 0.031  | 0.4267 | -0.13 | 0.2071 | 0.0876 | 1.1779  | 0.1195  |
| rs11703957 | 34956901 | G | A | 0.21 | 0.23 | 0.0026 | 0.9311 | -0.02 | 0.0802 | 0.1216 | 2.0023  | -0.0414 |
| rs2010467  | 34958853 | T | C | 0.46 | 0.68 | 0.0527 | 0.2922 | -0.22 | 0.2824 | 0.0449 | -1.8381 | 0.2375  |
| rs2010659  | 34959579 | C | A | 0.14 | 0.33 | 0.0535 | 0.2881 | -0.19 | 0.1925 | 0.123  | 1.132   | 0.0695  |
| rs9610462  | 34960296 | A | C | 0.14 | 0.33 | 0.0508 | 0.3013 | -0.19 | 0.1925 | 0.123  | 1.132   | 0.0695  |

|                   |                 |          |          |             |          |               |               |             |               |               |                |              |
|-------------------|-----------------|----------|----------|-------------|----------|---------------|---------------|-------------|---------------|---------------|----------------|--------------|
| rs1001294         | 34960936        | T        | C        | 0.14        | 0.34     | 0.0541        | 0.2855        | -0.19       | 0.1786        | 0.1247        | 1.6193         | 0.0539       |
| rs2157249         | 34960985        | T        | C        | 0.86        | 0.66     | 0.0556        | 0.2786        | 0.2         | 0.1231        | 0.1925        | -0.9876        | -0.0694      |
| rs2157250         | 34961637        | G        | A        | 0.05        | 0.21     | 0.0582        | 0.2673        | -0.16       | 0.4548        | 0.1106        | 0.988          | 0.3442       |
| rs136142          | 34962971        | T        | C        | 0.35        | 0.37     | 0.0027        | 0.9188        | -0.02       | 0.1412        | 0.2709        | 1.7202         | -0.1297      |
| rs1557534         | 34963171        | A        | G        | 0.03        | 0.04     | 0.0028        | 0.9073        | -0.01       | NaN           | NaN           | NaN            | NaN          |
| rs136145          | 34965913        | A        | G        | 0.7         | 0.38     | 0.1048        | 0.1332        | 0.32        | 0.258         | 0.312         | 1.2744         | -0.054       |
| rs4821472         | 34977906        | C        | T        | 0.03        | 0.1      | 0.0262        | 0.4682        | -0.08       | NaN           | NaN           | NaN            | NaN          |
| rs5995271         | 34978039        | T        | G        | 0.07        | 0.09     | 0.004         | 0.8449        | -0.02       | 0.2683        | 0.1797        | 1.7851         | 0.0886       |
| rs5756115         | 34978498        | G        | A        | 0           | 0.23     | 0.1262        | 0.0987        | -0.23       | NaN           | NaN           | NaN            | NaN          |
| rs9610467         | 34979520        | A        | G        | 0.09        | 0.21     | 0.0271        | 0.4596        | -0.11       | 0.1528        | 0.1642        | 2.168          | -0.0114      |
| rs7284919         | 34982110        | C        | T        | 0.07        | 0.18     | 0.0299        | 0.4355        | -0.11       | 0.1255        | 0.1496        | 2.6268         | -0.0242      |
| rs136148          | 34982877        | T        | C        | 0.9         | 0.65     | 0.0929        | 0.158         | 0.25        | 0.1606        | 0.1107        | -1.569         | 0.0499       |
| rs4820224         | 34983221        | A        | G        | 0.01        | 0.1      | 0.0387        | 0.3701        | -0.09       | NaN           | NaN           | NaN            | NaN          |
| rs2413395         | 34984662        | A        | G        | 0.07        | 0        | 0.0392        | 0.3674        | 0.07        | 0.1679        | 0.1491        | 2.0733         | 0.0188       |
| rs136159          | 34986969        | T        | C        | 0           | 0.23     | 0.1304        | 0.0932        | -0.23       | NaN           | NaN           | NaN            | NaN          |
| rs129423          | 34987275        | T        | C        | 0           | 0.22     | 0.1276        | 0.0969        | -0.22       | NaN           | NaN           | NaN            | NaN          |
| rs136161          | 34987378        | C        | G        | 0.8         | 0.44     | 0.1419        | 0.0796        | 0.36        | 0.1617        | 0.164         | 1.5058         | -0.0022      |
| rs713929          | 34987542        | A        | G        | 0           | 0.22     | 0.1276        | 0.0969        | -0.22       | NaN           | NaN           | NaN            | NaN          |
| rs713753          | 34988480        | T        | C        | 0.12        | 0.56     | 0.2252        | 0.0268        | -0.45       | 0.2091        | 0.1315        | 1.5658         | 0.0776       |
| rs4419330         | 34988801        | C        | T        | 0.12        | 0.04     | 0.019         | 0.5431        | 0.07        | 0.1707        | 0.1186        | 1.6238         | 0.0521       |
| rs2239785         | 34991276        | A        | G        | 0.73        | 0.22     | 0.2612        | 0.017         | 0.51        | 0.0719        | 0.1722        | 2.3367         | -0.1003      |
| rs136174          | 34991482        | C        | A        | 0           | 0.22     | 0.1206        | 0.1066        | -0.22       | NaN           | NaN           | NaN            | NaN          |
| rs136175          | 34991512        | A        | G        | 1           | 0.78     | 0.1206        | 0.1066        | 0.22        | NaN           | NaN           | NaN            | NaN          |
| rs136176          | 34991592        | G        | A        | 0           | 0.22     | 0.126         | 0.099         | -0.22       | NaN           | NaN           | NaN            | NaN          |
| rs136177          | 34991788        | A        | G        | 0.97        | 0.78     | 0.0853        | 0.1764        | 0.19        | NaN           | NaN           | NaN            | NaN          |
| rs16996616        | 34991837        | A        | G        | 0.06        | 0.01     | 0.0229        | 0.4999        | 0.05        | 0.2036        | 0.0986        | 1.7291         | 0.105        |
| <b>rs73885319</b> | <b>34991852</b> | <b>G</b> | <b>A</b> | <b>0.38</b> | <b>0</b> | <b>0.2349</b> | <b>0.0236</b> | <b>0.38</b> | <b>0.5129</b> | <b>0.0389</b> | <b>-2.3052</b> | <b>0.474</b> |
| <b>rs60910145</b> | <b>34991980</b> | <b>G</b> | <b>T</b> | <b>0.38</b> | <b>0</b> | <b>0.2349</b> | <b>0.0236</b> | <b>0.38</b> | <b>0.5129</b> | <b>0.0389</b> | <b>-2.3052</b> | <b>0.474</b> |
| <b>rs71785313</b> | <b>34991997</b> | <b>D</b> | <b>I</b> | <b>0.08</b> | <b>0</b> | <b>0.0436</b> | <b>0.3392</b> | <b>0.08</b> | <b>0.3833</b> | <b>0.1073</b> | <b>0.8937</b>  | <b>0.276</b> |
| rs2012928         | 34993948        | A        | G        | 0.17        | 0.2      | 0.0035        | 0.8649        | -0.03       | 0.1449        | 0.139         | 1.4612         | 0.0059       |
| rs136183          | 34996271        | T        | C        | 0.34        | 0.49     | 0.0249        | 0.4801        | -0.15       | 0.0817        | 0.2287        | 1.962          | -0.147       |
| rs4821475         | 34999041        | C        | T        | 0.37        | 0.77     | 0.1723        | 0.0532        | -0.41       | 0.0869        | 0.1894        | 1.6174         | -0.1026      |
| rs9306308         | 34999716        | A        | T        | 0.02        | 0.19     | 0.0749        | 0.206         | -0.17       | NaN           | NaN           | NaN            | NaN          |
| rs136187          | 35002222        | C        | A        | 0.5         | 0.37     | 0.0204        | 0.5273        | 0.13        | 0.2527        | 0.0504        | -1.6072        | 0.2023       |
| rs136196          | 35005096        | A        | G        | 0.31        | 0.36     | 0.0043        | 0.8315        | -0.04       | 0.0778        | 0.1304        | 1.4805         | -0.0526      |
| rs2481            | 35007346        | A        | G        | 0.09        | 0.14     | 0.0073        | 0.7391        | -0.05       | 0.0715        | 0.0776        | 2.1868         | -0.0061      |
| rs735854          | 35009004        | C        | T        | 0.93        | 0.37     | 0.3508        | 0.0056        | 0.56        | 0.0609        | 0.0732        | 2.3478         | -0.0123      |

|            |          |   |   |      |      |        |        |       |        |        |         |         |
|------------|----------|---|---|------|------|--------|--------|-------|--------|--------|---------|---------|
| rs5756129  | 35014038 | C | T | 0.21 | 0.23 | 0.0031 | 0.8916 | -0.02 | 0.0903 | 0.0901 | 1.4315  | 0.0002  |
| rs5756130  | 35014277 | T | C | 0.18 | 0.05 | 0.0415 | 0.3525 | 0.13  | 0.1303 | 0.0813 | 1.0676  | 0.049   |
| rs2269529  | 35014300 | C | T | 0.03 | 0.18 | 0.0649 | 0.2405 | -0.15 | NaN    | NaN    | NaN     | NaN     |
| rs2269530  | 35014304 | A | C | 0.03 | 0.18 | 0.068  | 0.2292 | -0.16 | NaN    | NaN    | NaN     | NaN     |
| rs11912763 | 35014668 | A | G | 0.33 | 0    | 0.1975 | 0.0382 | 0.33  | 0.5054 | 0.0184 | -3.1245 | 0.487   |
| rs1476009  | 35016002 | A | G | 0.04 | 0.04 | 0.0024 | 0.9498 | -0.01 | NaN    | NaN    | NaN     | NaN     |
| rs6000229  | 35016105 | T | C | 0.72 | 0.01 | 0.5347 | 0.0006 | 0.7   | 0.0301 | 0.088  | 2.4195  | -0.0579 |
| rs6000233  | 35017908 | C | T | 0.36 | 0.01 | 0.1984 | 0.0378 | 0.35  | 0.0481 | 0.1097 | 1.6645  | -0.0616 |
| rs710181   | 35021553 | A | C | 0.02 | 0.05 | 0.0063 | 0.7647 | -0.02 | NaN    | NaN    | NaN     | NaN     |
| rs875725   | 35021637 | C | T | 0.07 | 0.01 | 0.0226 | 0.5031 | 0.06  | 0.0801 | 0.0426 | 1.5067  | 0.0375  |
| rs2239786  | 35021873 | C | G | 0.29 | 0.02 | 0.1392 | 0.0827 | 0.27  | 0.0623 | 0.0821 | 1.4104  | -0.0197 |
| rs875726   | 35021915 | A | G | 0.19 | 0.7  | 0.2655 | 0.0161 | -0.51 | 0.1101 | 0.0587 | 0.9695  | 0.0515  |
| rs16996648 | 35022698 | C | T | 0.4  | 0.01 | 0.2282 | 0.0258 | 0.38  | 0.3122 | 0.0127 | -3.1668 | 0.2995  |
| rs9610486  | 35023388 | A | G | 0.19 | 0.7  | 0.2655 | 0.0161 | -0.51 | 0.1101 | 0.059  | 0.9767  | 0.0512  |
| rs5756133  | 35023926 | A | T | 0.09 | 0.65 | 0.3293 | 0.0073 | -0.55 | 0.2674 | 0.0428 | 0.0834  | 0.2246  |
| rs2187776  | 35025119 | C | T | 0.31 | 0.05 | 0.122  | 0.1047 | 0.26  | 0.0567 | 0.0873 | 1.3852  | -0.0306 |
| rs4821481  | 35025888 | T | C | 0.73 | 0.06 | 0.4761 | 0.0013 | 0.67  | 0.0336 | 0.0832 | 1.9913  | -0.0496 |
| rs2239787  | 35028938 | A | C | 0    | 0.04 | 0.019  | 0.5432 | -0.04 | NaN    | NaN    | NaN     | NaN     |
| rs9619601  | 35030121 | A | G | 0.96 | 0.96 | 0.0028 | 0.9121 | 0.01  | NaN    | NaN    | NaN     | NaN     |
| rs8137674  | 35032048 | A | G | 0.99 | 1    | 0.0089 | 0.7018 | -0.01 | NaN    | NaN    | NaN     | NaN     |
| rs8138016  | 35032095 | A | G | 0.06 | 0.01 | 0.0164 | 0.5762 | 0.04  | 0.1404 | 0.0444 | 1.2423  | 0.0959  |
| rs17806543 | 35034780 | A | C | 0    | 0.06 | 0.0344 | 0.4002 | -0.06 | NaN    | NaN    | NaN     | NaN     |
| rs2239781  | 35034987 | T | C | 0.02 | 0.19 | 0.083  | 0.1827 | -0.17 | NaN    | NaN    | NaN     | NaN     |
| rs2239782  | 35035050 | A | G | 0.05 | 0.24 | 0.07   | 0.222  | -0.18 | 0.1129 | 0.0432 | 1.4986  | 0.0697  |
| rs1557529  | 35035475 | A | G | 0.48 | 0.96 | 0.2784 | 0.0137 | -0.47 | 0.1822 | 0.0084 | -2.6592 | 0.1737  |
| rs1557530  | 35035568 | A | G | 0.21 | 0.67 | 0.2206 | 0.0284 | -0.46 | 0.0949 | 0.0551 | 0.9039  | 0.0398  |
| rs2187777  | 35036688 | T | C | 0    | 0.04 | 0.0204 | 0.5276 | -0.04 | NaN    | NaN    | NaN     | NaN     |
| rs2157252  | 35036825 | A | C | 0.23 | 0.67 | 0.201  | 0.0365 | -0.44 | 0.0732 | 0.0603 | 1.2577  | 0.0129  |
| rs2157254  | 35037146 | C | G | 0.23 | 0.67 | 0.201  | 0.0365 | -0.44 | 0.0732 | 0.0603 | 1.2577  | 0.0129  |
| rs2157256  | 35037607 | A | G | 0.71 | 0.33 | 0.1481 | 0.0733 | 0.38  | 0.0764 | 0.0306 | -1.2237 | 0.0458  |
| rs2413396  | 35038030 | C | T | 0.33 | 0.9  | 0.3389 | 0.0065 | -0.57 | 0.092  | 0.0187 | -2.3259 | 0.0733  |
| rs5750250  | 35038429 | G | A | 0.36 | 0.94 | 0.3757 | 0.0042 | -0.58 | 0.1024 | 0.0145 | -2.5454 | 0.088   |
| rs3830104  | 35038570 | C | T | 0.03 | 0.08 | 0.0165 | 0.5753 | -0.05 | NaN    | NaN    | NaN     | NaN     |
| rs4820229  | 35038699 | G | A | 0.23 | 0.67 | 0.1973 | 0.0383 | -0.44 | 0.0732 | 0.0607 | 1.2661  | 0.0124  |
| rs4820230  | 35039485 | G | A | 0.71 | 0.32 | 0.1544 | 0.0674 | 0.39  | 0.0771 | 0.0305 | -1.2352 | 0.0466  |
| rs3752462  | 35040129 | T | C | 0.77 | 0.33 | 0.201  | 0.0365 | 0.44  | 0.0614 | 0.0732 | -0.8358 | -0.0118 |
| rs4820232  | 35040487 | G | A | 0.25 | 0.67 | 0.181  | 0.0474 | -0.42 | 0.0503 | 0.0668 | 1.6014  | -0.0166 |

|            |          |   |   |      |      |        |        |       |        |        |         |         |
|------------|----------|---|---|------|------|--------|--------|-------|--------|--------|---------|---------|
| rs8141971  | 35041308 | G | A | 0.22 | 0.67 | 0.2095 | 0.0328 | -0.45 | 0.0865 | 0.0587 | 1.0738  | 0.0278  |
| rs5756152  | 35042418 | A | G | 0.42 | 0.04 | 0.1962 | 0.0389 | 0.37  | 0.2751 | 0.0175 | -2.1833 | 0.2576  |
| rs9610489  | 35043477 | C | T | 0.09 | 0.19 | 0.0204 | 0.5277 | -0.09 | 0.0924 | 0.0466 | 1.3336  | 0.0458  |
| rs2239784  | 35044581 | T | C | 0.3  | 0.91 | 0.3955 | 0.0033 | -0.61 | 0.0739 | 0.0379 | -1.0935 | 0.036   |
| rs1005570  | 35045220 | A | G | 0.5  | 0.13 | 0.161  | 0.0617 | 0.37  | 0.1437 | 0.0305 | -1.6247 | 0.1132  |
| rs2071731  | 35048804 | A | G | 0.21 | 0.37 | 0.0309 | 0.4272 | -0.15 | 0.0933 | 0.0505 | 0.645   | 0.0428  |
| rs12159211 | 35049109 | A | G | 0.01 | 0.04 | 0.0108 | 0.6644 | -0.03 | NaN    | NaN    | NaN     | NaN     |
| rs5756154  | 35050370 | T | C | 0.3  | 0.55 | 0.0654 | 0.2385 | -0.25 | 0.0603 | 0.0605 | 1.0802  | -0.0002 |
| rs5756156  | 35050725 | T | C | 0.25 | 0.54 | 0.0912 | 0.1618 | -0.29 | 0.0892 | 0.0512 | 0.6283  | 0.0381  |
| rs8136069  | 35052436 | A | C | 0.21 | 0.37 | 0.0324 | 0.4152 | -0.16 | 0.0933 | 0.0472 | 0.569   | 0.0461  |
| rs8136336  | 35052480 | G | A | 0.04 | 0.04 | 0.0022 | 0.9966 | 0     | NaN    | NaN    | NaN     | NaN     |
| rs16996672 | 35055916 | T | C | 0.37 | 0    | 0.2267 | 0.0263 | 0.37  | 0.2783 | 0.0196 | -2.0506 | 0.2587  |
| rs16996677 | 35057229 | A | G | 0.37 | 0    | 0.219  | 0.029  | 0.36  | 0.2774 | 0.0197 | -2.0454 | 0.2578  |
| rs11704382 | 35058098 | A | C | 0    | 0.08 | 0.044  | 0.3378 | -0.08 | NaN    | NaN    | NaN     | NaN     |
| rs4820234  | 35059020 | A | G | 0.27 | 0.46 | 0.0412 | 0.3543 | -0.19 | 0.078  | 0.0597 | 0.8686  | 0.0183  |
| rs2413398  | 35060893 | T | G | 0.73 | 0.35 | 0.1453 | 0.0761 | 0.38  | 0.0578 | 0.0813 | -0.2741 | -0.0234 |
| rs1557540  | 35062483 | C | T | 0.26 | 0.46 | 0.0432 | 0.3426 | -0.19 | 0.0812 | 0.0583 | 0.8637  | 0.0229  |
| rs713839   | 35063884 | G | A | 0.27 | 0.65 | 0.1419 | 0.0797 | -0.37 | 0.0824 | 0.0635 | 0.8787  | 0.0189  |
| rs739096   | 35071686 | C | G | 0.03 | 0.53 | 0.3181 | 0.0084 | -0.5  | NaN    | NaN    | NaN     | NaN     |
| rs6000244  | 35071832 | T | C | 0.06 | 0    | 0.0341 | 0.4023 | 0.06  | 0.257  | 0.0431 | 0.4544  | 0.2139  |
| rs739097   | 35076025 | G | A | 0.65 | 0.54 | 0.0128 | 0.6303 | 0.1   | 0.0747 | 0.0846 | 0.9153  | -0.0099 |
| rs5756164  | 35078939 | A | G | 0.05 | 0.06 | 0.0026 | 0.9248 | -0.01 | 0.1732 | 0.0451 | 1.1679  | 0.1281  |
| rs11089788 | 35081047 | A | C | 0.44 | 0.51 | 0.0075 | 0.7353 | -0.07 | 0.1615 | 0.0553 | -0.3323 | 0.1062  |
| rs136206   | 35085444 | A | G | 0.67 | 0.31 | 0.1317 | 0.0915 | 0.36  | 0.0557 | 0.0582 | -0.1922 | -0.0026 |
| rs16996693 | 35086202 | C | A | 0.01 | 0.01 | 0.0027 | 0.9192 | 0     | NaN    | NaN    | NaN     | NaN     |
| rs9306310  | 35088204 | A | G | 0.01 | 0.54 | 0.3558 | 0.0053 | -0.53 | NaN    | NaN    | NaN     | NaN     |
| rs136211   | 35088493 | A | G | 0.55 | 0.66 | 0.0143 | 0.6059 | -0.11 | 0.1116 | 0.0282 | -0.4026 | 0.0834  |
| rs16996704 | 35094734 | A | G | 0.54 | 0.12 | 0.204  | 0.0351 | 0.42  | 0.0967 | 0.028  | -0.5759 | 0.0687  |
| rs933224   | 35095949 | T | C | 0.58 | 0.67 | 0.0092 | 0.6948 | -0.08 | 0.1274 | 0.0226 | -1.1861 | 0.1049  |
| rs1883273  | 35099631 | G | A | 0.59 | 0.34 | 0.0645 | 0.2418 | 0.25  | 0.064  | 0.0234 | -1.0759 | 0.0407  |
| rs6000262  | 35099984 | A | G | 0.59 | 0.33 | 0.0672 | 0.2319 | 0.25  | 0.064  | 0.0234 | -1.0759 | 0.0407  |



**Table S4.** Genotype for the Yoruba Hapmap samples.

| Family ID | Individual ID | Father ID | Mother ID | Sex (1=male;<br>2=female) | rs73885319<br>(G1) | rs60910145<br>(G1) | rs71785313<br>(G2) |
|-----------|---------------|-----------|-----------|---------------------------|--------------------|--------------------|--------------------|
| Y001      | NA18484       | NA18486   | NA18488   | 2                         | GA                 | GT                 | II                 |
| Y002      | NA18485       | NA18487   | NA18489   | 1                         | AA                 | TT                 | II                 |
| Y001      | NA18486       | 0         | 0         | 1                         | GG                 | GG                 | II                 |
| Y002      | NA18487       | 0         | 0         | 1                         | AA                 | TT                 | DI                 |
| Y001      | NA18488       | 0         | 0         | 2                         | AA                 | TT                 | II                 |
| Y002      | NA18489       | 0         | 0         | 2                         | GA                 | GT                 | II                 |
| Y003      | NA18497       | NA18498   | NA18499   | 1                         | GG                 | GG                 | II                 |
| Y003      | NA18498       | 0         | 0         | 1                         | GG                 | GG                 | II                 |
| Y003      | NA18499       | 0         | 0         | 2                         | GA                 | GT                 | II                 |
| Y004      | NA18500       | NA18501   | NA18502   | 1                         | GA                 | GT                 | II                 |
| Y004      | NA18501       | 0         | 0         | 1                         | GA                 | GT                 | II                 |
| Y004      | NA18502       | 0         | 0         | 2                         | AA                 | TT                 | DI                 |
| Y005      | NA18503       | NA18504   | NA18505   | 1                         | GG                 | GG                 | II                 |
| Y005      | NA18504       | 0         | 0         | 1                         | GA                 | GT                 | DI                 |
| Y005      | NA18505       | 0         | 0         | 2                         | GG                 | GG                 | II                 |
| Y009      | NA18506       | NA18507   | NA18508   | 1                         | GA                 | GT                 | II                 |
| Y009      | NA18507       | 0         | 0         | 1                         | GA                 | GT                 | II                 |
| Y009      | NA18508       | 0         | 0         | 2                         | GA                 | GT                 | II                 |
| Y010      | NA18509       | 0         | NA18511   | 1                         | GA                 | GT                 | II                 |
| Y010      | NA18510       | 0         | 0         | 1                         | AA                 | TT                 | II                 |
| Y010      | NA18511       | 0         | 0         | 2                         | GG                 | GG                 | II                 |
| Y013      | NA18515       | NA18516   | NA18517   | 1                         | GA                 | GT                 | DI                 |
| Y013      | NA18516       | 0         | 0         | 1                         | GA                 | GT                 | DI                 |
| Y013      | NA18517       | 0         | 0         | 2                         | GG                 | GG                 | II                 |
| Y014      | NA18518       | NA18519   | NA18520   | 2                         | GA                 | GT                 | II                 |
| Y014      | NA18519       | 0         | 0         | 1                         | AA                 | TT                 | II                 |
| Y014      | NA18520       | 0         | 0         | 2                         | GA                 | GT                 | II                 |
| Y016      | NA18521       | NA18522   | NA18523   | 1                         | GA                 | GT                 | II                 |
| Y016      | NA18522       | 0         | 0         | 1                         | GA                 | GT                 | II                 |
| Y016      | NA18523       | 0         | 0         | 2                         | AA                 | TT                 | II                 |
| Y018      | NA18852       | 0         | 0         | 2                         | AA                 | TT                 | II                 |
| Y018      | NA18853       | 0         | 0         | 1                         | GA                 | GT                 | II                 |
| Y018      | NA18854       | NA18853   | NA18852   | 1                         | AA                 | TT                 | II                 |
| Y023      | NA18855       | 0         | 0         | 2                         | GA                 | GT                 | II                 |
| Y023      | NA18856       | 0         | 0         | 1                         | GG                 | GG                 | II                 |
| Y023      | NA18857       | NA18856   | NA18855   | 1                         | GG                 | GG                 | II                 |
| Y012      | NA18858       | 0         | 0         | 2                         | AA                 | TT                 | DI                 |
| Y012      | NA18859       | 0         | 0         | 1                         | AA                 | TT                 | II                 |
| Y012      | NA18860       | NA18859   | NA18858   | 1                         | AA                 | TT                 | II                 |
| Y024      | NA18861       | 0         | 0         | 2                         | GA                 | GT                 | II                 |
| Y024      | NA18862       | 0         | 0         | 1                         | GG                 | GG                 | II                 |
| Y024      | NA18863       | NA18862   | NA18861   | 1                         | GA                 | GT                 | II                 |
| Y007      | NA18867       | 0         | 0         | 2                         | AA                 | TT                 | DI                 |
| Y007      | NA18868       | 0         | 0         | 1                         | GA                 | GT                 | II                 |
| Y007      | NA18869       | NA18868   | NA18867   | 1                         | AA                 | TT                 | DI                 |
| Y017      | NA18870       | 0         | 0         | 2                         | GA                 | GT                 | DI                 |
| Y017      | NA18871       | 0         | 0         | 1                         | GA                 | GT                 | II                 |

|      |         |         |         |   |    |    |    |
|------|---------|---------|---------|---|----|----|----|
| Y017 | NA18872 | NA18871 | NA18870 | 1 | GA | GT | DI |
| Y019 | NA18873 | 0       | 0       | 2 | AA | TT | II |
| Y019 | NA18874 | 0       | 0       | 1 | GA | GT | DI |
| Y019 | NA18875 | NA18874 | NA18873 | 2 | GA | GT | II |
| Y025 | NA18907 | 0       | 0       | 2 | GA | GT | DI |
| Y025 | NA18908 | 0       | 0       | 1 | AA | TT | II |
| Y027 | NA18909 | 0       | 0       | 2 | GA | GT | DI |
| Y027 | NA18910 | 0       | 0       | 1 | GA | GT | II |
| Y027 | NA18911 | NA18910 | NA18909 | 1 | AA | TT | DI |
| Y028 | NA18912 | 0       | 0       | 2 | AA | TT | II |
| Y028 | NA18913 | 0       | 0       | 1 | AA | TT | DI |
| Y028 | NA18914 | NA18913 | NA18912 | 1 | AA | TT | II |
| Y030 | NA18916 | 0       | 0       | 2 | GA | GT | II |
| Y030 | NA18917 | 0       | 0       | 1 | GA | GT | DI |
| Y033 | NA18923 | 0       | 0       | 1 | AA | TT | II |
| Y033 | NA18924 | 0       | 0       | 2 | AA | TT | II |
| Y033 | NA18925 | NA18923 | NA18924 | 1 | AA | TT | II |
| Y030 | NA18930 | NA18917 | NA18916 | 2 | AA | TT | DI |
| Y036 | NA18933 | 0       | 0       | 2 | GA | GT | II |
| Y036 | NA18934 | 0       | 0       | 1 | AA | TT | II |
| Y036 | NA18935 | NA18934 | NA18933 | 1 | GA | GT | II |
| Y040 | NA19092 | 0       | 0       | 1 | AA | TT | II |
| Y040 | NA19093 | 0       | 0       | 2 | GA | GT | II |
| Y040 | NA19094 | NA19092 | NA19093 | 2 | AA | TT | II |
| Y041 | NA19095 | 0       | 0       | 2 | AA | TT | II |
| Y041 | NA19096 | 0       | 0       | 1 | GA | GT | II |
| Y041 | NA19097 | NA19096 | NA19095 | 2 | GA | GT | II |
| Y105 | NA19098 | 0       | 0       | 1 | GA | GT | II |
| Y105 | NA19099 | 0       | 0       | 2 | GA | GT | II |
| Y105 | NA19100 | NA19098 | NA19099 | 2 | AA | TT | II |
| Y042 | NA19101 | 0       | 0       | 1 | GA | GT | II |
| Y042 | NA19102 | 0       | 0       | 2 | AA | TT | DI |
| Y042 | NA19103 | NA19101 | NA19102 | 1 | AA | TT | II |
| Y006 | NA19107 | 0       | 0       | 1 | GA | GT | II |
| Y006 | NA19108 | 0       | 0       | 2 | GA | GT | II |
| Y006 | NA19109 | NA19107 | NA19108 | 2 | AA | TT | II |
| Y079 | NA19113 | 0       | 0       | 1 | GA | GT | DI |
| Y079 | NA19114 | 0       | 0       | 2 | GA | GT | II |
| Y079 | NA19115 | NA19113 | NA19114 | 2 | AA | TT | DI |
| Y060 | NA19116 | 0       | 0       | 2 | GG | GG | II |
| Y100 | NA19117 | 0       | 0       | 1 | AA | TT | DI |
| Y100 | NA19118 | 0       | 0       | 2 | 0  | 0  | 0  |
| Y060 | NA19119 | 0       | 0       | 1 | GA | GT | II |
| Y060 | NA19120 | NA19119 | NA19116 | 1 | GG | GG | II |
| Y061 | NA19121 | 0       | 0       | 1 | GA | GT | II |
| Y061 | NA19122 | 0       | 0       | 2 | AA | TT | II |
| Y061 | NA19123 | NA19121 | NA19122 | 1 | AA | TT | II |
| Y077 | NA19127 | 0       | 0       | 2 | GA | GT | II |
| Y077 | NA19128 | 0       | 0       | 1 | GA | GT | II |
| Y077 | NA19129 | NA19128 | NA19127 | 2 | GA | GT | II |

|      |         |         |         |   |    |    |    |
|------|---------|---------|---------|---|----|----|----|
| Y101 | NA19130 | 0       | 0       | 1 | AA | TT | II |
| Y101 | NA19131 | 0       | 0       | 2 | GA | GT | II |
| Y101 | NA19132 | NA19130 | NA19131 | 2 | AA | TT | II |
| Y043 | NA19137 | 0       | 0       | 2 | GA | GT | II |
| Y043 | NA19138 | 0       | 0       | 1 | GA | GT | II |
| Y043 | NA19139 | NA19138 | NA19137 | 1 | GA | GT | II |
| Y071 | NA19140 | 0       | 0       | 2 | GA | GT | II |
| Y071 | NA19141 | 0       | 0       | 1 | GA | GT | II |
| Y071 | NA19142 | NA19141 | NA19140 | 1 | GG | GG | II |
| Y074 | NA19143 | 0       | 0       | 2 | GA | GT | II |
| Y074 | NA19144 | 0       | 0       | 1 | AA | TT | II |
| Y074 | NA19145 | NA19144 | NA19143 | 1 | AA | TT | II |
| Y075 | NA19146 | 0       | 0       | 1 | GA | GT | II |
| Y075 | NA19147 | 0       | 0       | 2 | GA | GT | II |
| Y075 | NA19148 | NA19146 | NA19147 | 2 | GA | GT | II |
| Y073 | NA19149 | 0       | 0       | 2 | GA | GT | II |
| Y073 | NA19150 | 0       | 0       | 1 | GA | GT | II |
| Y073 | NA19151 | NA19150 | NA19149 | 2 | GG | GG | II |
| Y072 | NA19152 | 0       | 0       | 2 | GA | GT | II |
| Y072 | NA19153 | 0       | 0       | 1 | AA | TT | II |
| Y072 | NA19154 | NA19153 | NA19152 | 1 | GA | GT | II |
| Y056 | NA19159 | 0       | 0       | 2 | AA | TT | II |
| Y056 | NA19160 | 0       | 0       | 1 | AA | TT | II |
| Y056 | NA19161 | NA19160 | NA19159 | 1 | AA | TT | II |
| Y047 | NA19171 | 0       | 0       | 1 | GA | GT | II |
| Y047 | NA19172 | 0       | 0       | 2 | GG | GG | II |
| Y047 | NA19173 | NA19171 | NA19172 | 1 | GA | GT | II |
| Y100 | NA19174 | NA19117 | NA19118 | 1 | AA | TT | II |
| Y044 | NA19175 | 0       | 0       | 1 | GA | GT | II |
| Y044 | NA19176 | 0       | 0       | 2 | AA | TT | II |
| Y044 | NA19177 | NA19175 | NA19176 | 1 | GA | GT | II |
| Y038 | NA19178 | 0       | 0       | 1 | AA | TT | DI |
| Y038 | NA19179 | 0       | 0       | 2 | GG | GG | II |
| Y038 | NA19180 | NA19178 | NA19179 | 2 | GA | GT | II |
| Y052 | NA19181 | 0       | 0       | 1 | GA | GT | II |
| Y052 | NA19182 | 0       | 0       | 2 | GG | GG | II |
| Y052 | NA19183 | NA19181 | NA19182 | 2 | GA | GT | II |
| Y039 | NA19184 | 0       | 0       | 1 | GA | GT | DI |
| Y039 | NA19185 | 0       | 0       | 2 | AA | TT | II |
| Y039 | NA19186 | NA19184 | NA19185 | 1 | AA | TT | DI |
| Y111 | NA19189 | 0       | 0       | 1 | GA | GT | II |
| Y111 | NA19190 | 0       | 0       | 2 | GG | GG | II |
| Y111 | NA19191 | NA19189 | NA19190 | 1 | GG | GG | II |
| Y112 | NA19192 | 0       | 0       | 1 | AA | TT | II |
| Y112 | NA19193 | 0       | 0       | 2 | AA | TT | II |
| Y112 | NA19194 | NA19192 | NA19193 | 1 | AA | TT | II |
| Y035 | NA19197 | 0       | 0       | 2 | GA | GT | II |
| Y035 | NA19198 | 0       | 0       | 1 | AA | TT | II |
| Y035 | NA19199 | NA19198 | NA19197 | 2 | AA | TT | II |
| Y045 | NA19200 | 0       | 0       | 1 | GA | GT | II |

|      |         |         |         |   |    |    |    |
|------|---------|---------|---------|---|----|----|----|
| Y045 | NA19201 | 0       | 0       | 2 | AA | TT | II |
| Y045 | NA19202 | NA19200 | NA19201 | 2 | AA | TT | II |
| Y048 | NA19203 | 0       | 0       | 1 | AA | TT | II |
| Y048 | NA19204 | 0       | 0       | 2 | GG | GG | II |
| Y048 | NA19205 | NA19203 | NA19204 | 1 | GA | GT | II |
| Y051 | NA19206 | 0       | 0       | 2 | GG | GG | II |
| Y051 | NA19207 | 0       | 0       | 1 | AA | TT | II |
| Y051 | NA19208 | NA19207 | NA19206 | 1 | GA | GT | II |
| Y050 | NA19209 | 0       | 0       | 2 | AA | TT | II |
| Y050 | NA19210 | 0       | 0       | 1 | AA | TT | II |
| Y050 | NA19211 | NA19210 | NA19209 | 1 | AA | TT | II |
| Y110 | NA19213 | 0       | 0       | 1 | GA | GT | II |
| Y110 | NA19214 | 0       | 0       | 2 | AA | TT | II |
| Y110 | NA19215 | NA19213 | NA19214 | 2 | GA | GT | II |
| Y058 | NA19221 | NA19223 | NA19222 | 2 | AA | TT | DI |
| Y058 | NA19222 | 0       | 0       | 2 | AA | TT | II |
| Y058 | NA19223 | 0       | 0       | 1 | AA | TT | DD |
| Y057 | NA19224 | NA19226 | NA19225 | 1 | GA | GT | II |
| Y057 | NA19225 | 0       | 0       | 2 | GA | GT | II |
| Y057 | NA19226 | 0       | 0       | 1 | GA | GT | II |
| Y116 | NA19235 | 0       | 0       | 2 | AA | TT | II |
| Y116 | NA19236 | 0       | 0       | 1 | GA | GT | II |
| Y116 | NA19237 | NA19236 | NA19235 | 2 | AA | TT | II |
| Y117 | NA19238 | 0       | 0       | 2 | AA | TT | II |
| Y117 | NA19239 | 0       | 0       | 1 | GA | GT | II |
| Y117 | NA19240 | NA19239 | NA19238 | 2 | GA | GT | II |
| Y120 | NA19247 | 0       | 0       | 2 | GA | GT | II |
| Y120 | NA19248 | 0       | 0       | 1 | AA | TT | II |
| Y120 | NA19249 | NA19248 | NA19247 | 1 | GA | GT | II |
| Y025 | NA19252 | 0       | NA18907 | 1 | AA | TT | DI |
| Y092 | NA19256 | 0       | 0       | 1 | GA | GT | II |
| Y092 | NA19257 | 0       | 0       | 2 | GG | GG | II |
| Y092 | NA19258 | NA19256 | NA19257 | 1 | GG | GG | II |

**Table S5.** Genotype data for samples whose plasma was tested for trypanosomal lytic potential. Last column shows presence or absence of lytic activity in the plasma against *Trypanosoma brucei rhodesiense*.

| Subject | rs73885319 (G1) | rs60910145 (G1) | rs71785313 (G2) | ETat1.2R lysis |
|---------|-----------------|-----------------|-----------------|----------------|
| 1       | AA              | TT              | II              | -              |
| 2       | AA              | TT              | II              | -              |
| 3       | GG              | GG              | II              | +              |
| 4       | AA              | TT              | II              | -              |
| 5       | AA              | TT              | II              | -              |
| 6       | GA              | GT              | II              | +              |
| 7       | GG              | GG              | II              | +              |
| 8       | GA              | GT              | II              | +              |
| 9       | AA              | TT              | DI              | +              |
| 10      | GA              | GT              | II              | +              |
| 11      | GA              | GT              | II              | +              |
| 12      | GA              | GT              | II              | +              |
| 13      | AA              | TT              | DI              | +              |
| 14      | GA              | GT              | DI              | +              |
| 15      | AA              | TT              | II              | -              |
| 16      | AA              | TT              | II              | -              |
| 17      | AA              | TT              | II              | -              |
| 18      | AA              | TT              | II              | -              |
| 19      | GA              | GT              | II              | +              |
| 20      | GA              | GT              | II              | +              |
| 21      | AA              | TT              | II              | -              |
| 22      | AA              | TT              | II              | -              |
| 23      | AA              | TT              | DI              | +              |
| 24      | AA              | TT              | DI              | +              |
| 25      | AA              | TT              | II              | -              |
| 26      | AA              | TT              | DI              | +              |
| 27      | GA              | GT              | II              | +              |
| 28      | AA              | TT              | II              | -              |
| 29      | GG              | GT              | II              | +              |
| 30      | GG              | GG              | II              | +              |
| 31      | AA              | TT              | II              | -              |
| 32      | AA              | TT              | DI              | +              |
| 33      | AA              | TT              | II              | -              |
| 34      | GG              | GG              | II              | +              |
| 35      | AA              | TT              | II              | -              |
| 36      | AA              | TT              | II              | -              |
| 37      | GA              | GT              | II              | +              |
| 38      | AA              | TT              | DI              | +              |
| 39      | AA              | TT              | II              | -              |
| 40      | AA              | TT              | II              | -              |
| 41      | AA              | TT              | II              | -              |
| 42      | GA              | GT              | II              | +              |
| 43      | GA              | GT              | DI              | +              |
| 44      | GG              | GG              | II              | +              |

|    |    |    |      |   |
|----|----|----|------|---|
| 45 | AA | TT | DI   | + |
| 46 | GA | GT | II   | + |
| 47 | GA | GT | DI   | + |
| 48 | AA | TT | DI   | + |
| 49 | AA | TT | II   | - |
| 50 | AA | TT | II   | - |
| 51 | AA | TT | DI   | + |
| 52 | AA | TT | II   | - |
| 53 | AA | TT | DI   | + |
| 54 | AA | TT | DI   | + |
| 55 | GA | GT | II   | + |
| 56 | AA | TT | II   | - |
| 57 | AA | TT | DI   | + |
| 58 | GA | GT | II   | + |
| 59 | AA | TT | II   | - |
| 60 | AA | TT | DI   | + |
| 61 | GA | GT | DI   | + |
| 62 | AA | TT | DI   | + |
| 63 | AA | TT | DI   | + |
| 64 | AA | TT | II   | - |
| 65 | AA | TT | DD   | + |
| 66 | AA | TT | <NA> | - |
| 67 | AA | TT | II   | - |
| 68 | GA | GT | II   | + |
| 69 | GG | GG | II   | + |
| 70 | GA | GT | DI   | + |
| 71 | AA | TT | DI   | + |
| 72 | AA | TT | II   | - |
| 73 | AA | TT | DI   | + |
| 74 | GA | GT | II   | + |
| 75 | AA | TT | II   | - |

## References:

- S1. L. M. McKenzie *et al.*, NPHS2 variation in sporadic focal segmental glomerulosclerosis. *J Am Soc Nephrol* **18**, 2987 (Nov, 2007).
- S2. M. S. Orloff *et al.*, Variants in the Wilms' tumor gene are associated with focal segmental glomerulosclerosis in the African American population. *Physiol Genomics* **21**, 212 (Apr 14, 2005).
- S3. S. Purcell *et al.*, PLINK: a tool set for whole-genome association and population-based linkage analyses. *Am J Hum Genet* **81**, 559 (Sep, 2007).
- S4. B. I. Freedman *et al.*, Polymorphisms in the non-muscle myosin heavy chain 9 gene (MYH9) are strongly associated with end-stage renal disease historically attributed to hypertension in African Americans. *Kidney Int* **75**, 736 (Apr, 2009).
- S5. B. F. Voight, S. Kudravalli, X. Wen, J. K. Pritchard, A map of recent positive selection in the human genome. *PLoS Biol* **4**, e72 (Mar, 2006).
- S6. S. R. Grossman *et al.*, A composite of multiple signals distinguishes causal variants in regions of positive selection. *Science* **327**, 883 (Feb 12, 2010).
- S7. L. Lecordier *et al.*, C-terminal mutants of apolipoprotein L-I efficiently kill both *Trypanosoma brucei brucei* and *Trypanosoma brucei rhodesiense*. *PLoS Pathog* **5**, e1000685 (Dec, 2009).
- S8. B. L. Browning, S. R. Browning, A unified approach to genotype imputation and haplotype-phase inference for large data sets of trios and unrelated individuals. *Am J Hum Genet* **84**, 210 (Feb, 2009).
- S9. G. Ayodo *et al.*, Combining evidence of natural selection with association analysis increases power to detect malaria-resistance variants. *Am J Hum Genet* **81**, 234 (Aug, 2007).
- S10. P. C. Sabeti *et al.*, Genome-wide detection and characterization of positive selection in human populations. *Nature* **449**, 913 (Oct 18, 2007).
- S11. J. C. Barrett, B. Fry, J. Maller, M. J. Daly, Haploview: analysis and visualization of LD and haplotype maps. *Bioinformatics* **21**, 263 (Jan 15, 2005).
